# Supplementary material
Source: MDPI journal article supplement (https://www.mdpi.com/search?q=jpm-07-00015)
Supplement: s001 [file jpm-07-00015-s001.pdf]

**Supplementary Table 1.** Pre- and post-supplementation fasting insulin levels according to genotype for tagging SNPs in *FFAR4* ( $n = 208$ ).

| SNP        | Pre-Supplementation |                | Post-Supplementation |               | <i>p</i> -value (Gene-Diet) |
|------------|---------------------|----------------|----------------------|---------------|-----------------------------|
|            | Homozygotes         | CMA            | Homozygotes          | CMA           |                             |
| rs11187537 | 97.07 ± 10.05       | 77.22 ± 2.78   | 84.63 ± 4.82         | 82.63 ± 3.02  | 0.003                       |
| rs17108973 | 94.74 ± 8.16        | 74.48 ± 2.84   | 84.32 ± 4.02         | 82.47 ± 3.53  | 0.0009                      |
| rs7081686  | 93.14 ± 8.65        | 80.80 ± 5.71   | 85.36 ± 4.22         | 81.80 ± 3.77  | 0.03                        |
| rs17484310 | 91.88 ± 6.83        | 72.94 ± 4.01   | 85.42 ± 3.57         | 78.26 ± 3.66  | 0.03                        |
| rs1414929  | 89.55 ± 7.33        | 83.38 ± 7.07   | 84.75 ± 3.72         | 81.87 ± 4.37  | 0.2                         |
| rs12219199 | 88.18 ± 6.05        | 81.66 ± 8.11   | 82.91 ± 2.88         | 87.36 ± 9.30  | 0.2                         |
| rs2065875  | 86.80 ± 5.54        | 91.60 ± 15.15  | 83.07 ± 2.76         | 90.73 ± 17.14 | 1.0                         |
| rs11187527 | 88.93 ± 6.17        | 78.00 ± 5.49   | 83.88 ± 3.22         | 82.32 ± 5.40  | 0.3                         |
| rs11187529 | 85.83 ± 5.15        | 102.93 ± 29.43 | 83.76 ± 3.01         | 81.93 ± 7.21  | 0.6                         |
| rs11187515 | 84.62 ± 3.98        | 96.31 ± 19.61  | 84.88 ± 3.15         | 79.08 ± 6.43  | 0.3                         |
| rs12415204 | 88.37 ± 7.96        | 85.13 ± 4.74   | 84.78 ± 3.74         | 81.74 ± 4.32  | 0.2                         |
| rs11187534 | 82.67 ± 3.82        | 103.81 ± 20.29 | 81.92 ± 2.52         | 89.95 ± 9.55  | 0.4                         |

Values are mean ± SE; CMA: Carriers of the minor allele; *p*-values derived from a repeated MIXED procedure adjusted for age, sex and BMI.

**Supplementary Table 2.** Pre- and post-supplementation HOMA-IR index values according to genotype for tagging SNPs in *FFAR4* ( $n = 208$ ).

| SNP        | Pre-Supplementation |              | Post-Supplementation |             | <i>p</i> -value (Gene-Diet) |
|------------|---------------------|--------------|----------------------|-------------|-----------------------------|
|            | Homozygotes         | CMA          | Homozygotes          | CMA         |                             |
| rs11187537 | 3.17 ± 0.39         | 2.46 ± 0.09  | 2.76 ± 0.16          | 2.69 ± 0.10 | 0.01                        |
| rs17108973 | 3.08 ± 0.31         | 2.37 ± 0.09  | 2.74 ± 0.13          | 2.71 ± 0.12 | 0.003                       |
| rs7081686  | 3.02 ± 0.33         | 2.60 ± 0.22  | 2.81 ± 0.15          | 2.64 ± 0.12 | 0.07                        |
| rs17484310 | 3.00 ± 0.26         | 2.28 ± 0.13  | 2.80 ± 0.12          | 2.51 ± 0.12 | 0.04                        |
| rs1414929  | 2.89 ± 7.33         | 2.715 ± 0.27 | 2.77 ± 3.72          | 2.66 ± 0.14 | 0.2                         |
| rs12219199 | 2.85 ± 0.23         | 2.63 ± 0.25  | 2.71 ± 0.10          | 2.83 ± 0.28 | 0.4                         |
| rs2065875  | 2.80 ± 0.21         | 3.01 ± 0.48  | 2.71 ± 0.10          | 2.98 ± 0.52 | 0.9                         |
| rs11187527 | 2.89 ± 0.23         | 2.44 ± 0.18  | 2.74 ± 0.11          | 2.64 ± 0.18 | 0.3                         |
| rs11187529 | 2.75 ± 0.19         | 3.57 ± 1.24  | 2.73 ± 0.10          | 2.63 ± 0.27 | 0.4                         |
| rs11187515 | 2.71 ± 0.15         | 3.19 ± 0.76  | 2.77 ± 0.10          | 2.57 ± 0.23 | 0.3                         |
| rs12415204 | 2.89 ± 0.31         | 2.69 ± 0.14  | 2.76 ± 0.12          | 2.67 ± 0.15 | 0.2                         |
| rs11187534 | 2.66 ± 0.14         | 3.40 ± 0.78  | 2.67 ± 0.08          | 2.93 ± 0.32 | 0.5                         |

Values are mean ± SE; CMA: Carriers of the minor allele; *p*-values derived from a repeated MIXED procedure adjusted for age, sex and BMI.
